# Supplementary material for: Sr3P6O6N8—a highly condensed layered phosphate
Source: Royal Society of Chemistry journal article supplement (doi:10.1039/b905136h), 2009-01-01
Supplement: b905136h.pdf [file b905136h.pdf]

## Supporting Information

### **Sr<sub>3</sub>P<sub>6</sub>O<sub>6</sub>N<sub>8</sub> – A Highly Condensed Layered Phosphate**

*Stefan J. Sedlmaier, Jörn Schmedt auf der Günne, Wolfgang Schnick\**

Prof. Dr. W. Schnick, S. J. Sedlmaier, Dr. J. Schmedt auf der Günne  
Department Chemie und Biochemie  
Ludwig-Maximilians-Universität  
Butenandtstr. 5-13  
81377 München, Germany  
wolfgang.schnick@uni-muenchen.de

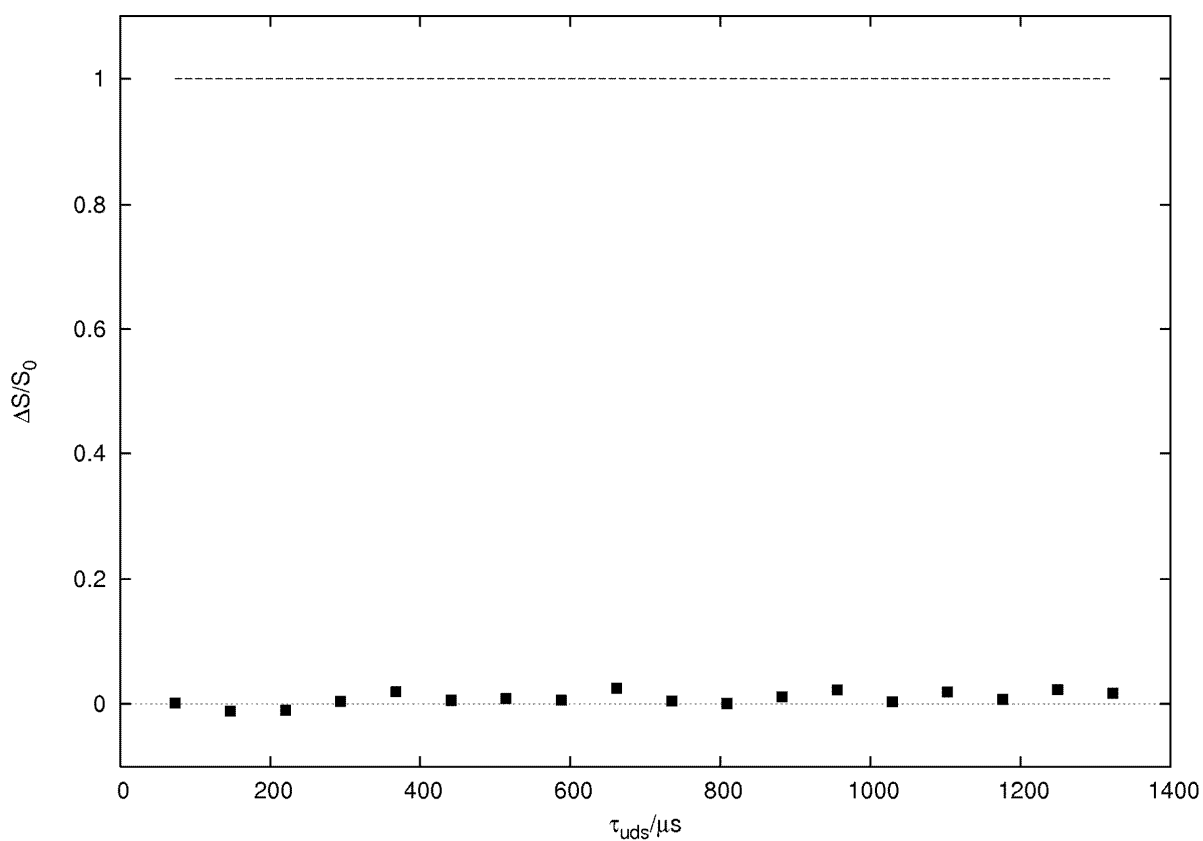

**Figure S1.**  $^{31}\text{P}\{^1\text{H}\}$ -CREDOR curve of the  $^{31}\text{P}$  resonance of  $\text{Sr}_3\text{P}_6\text{O}_6\text{N}_8$ ; the experimental conditions are the same as those used in reference [M. Roming, C. Feldmann, Y. S. Avadhut, J. Schmedt auf der Günne, *Chem. Mater.* 2008, **20** (18), 5787-5795.].
